# Supplementary material for: A network-based detection scheme of the jet stream core
Source: Copernicus journal article supplement (doi:10.5194/esd-2016-37), 2016-08-29
Supplement: Supplementary file [file esd-2016-37-AC4-supplement.pdf]

We are pleased with the generally positive reviewer remarks and thank the reviewer for the invested time and the very helpful comments provided, which will help us to improve the manuscript. A pointwise reply to the reviewer's comment is given below.

#### Specific Comments:

- 1.) *I'm not so sure that algorithms to detect jet cores are lacking (as stated in the abstract). There are actually a relatively large number of previously published papers which are based on either a single level/layer or zonal/sectorial mean latitude-pressure fields. The current application of the network-based method is yet another variation of this and so needs to be put in context with other (similar) methods which use single level or mean-layer wind fields (e.g. Koch et al, 2006, Archer & Caldiara 2008, Pena- Ortiz et al 2013). Hence at the risk of expanding the paper too much I think it would be useful to acknowledge some more of the previous work and to compare with the results obtained here (even though they are based on a 15 day mean as opposed to monthly means) and discuss why this method has advantages over the previous studies.*

We will rephrase as suggested.

- 2.) *I think 'time step' is a confusing choice of phrase to describe the 15 day means – maybe use 'time period' ?*

We will rephrase as suggested.

- 3.) *The simulated annealing actually uses the Rikus algorithm so it is being used as more than just a comparison. (page 1, line 18) and the abstract description should reflect that.*

We will rephrase as suggested.

- 4.) *Were the original runs (Fig. 2) done with with the un-optimised weights from table 1? If not what was used?*

The original runs were done with un-optimised weights from table 1. We will rephrase this part to make it clearer.

- 5.) *The supplementary plot (S1) is only mentioned in a single sentence without sufficient context to make it worth while. Either add more discussion or remove it?*

With this plot, we would like to show that our method is able to track also omega-shape pattern, but in principle we agree, it is not necessary in order to present our algorithm and we will remove it.

#### Technical Corrections.

In general, we agree with the referee and we answer only specific questions raised by the reviewer:

**Abstract Line 21:** In this case latitudes (and not longitudes) were meant: We present probabilistic, regionally distinct positions for both jets for all seasons. This shows that winter is characterized by two well separated jets at mean latitudes of 20°S and 140°N.

**Page 4, lines 1,2:** This means that the path of the jet stream core is not an injective function. This way, omega-shaped jet stream paths are possible.

**Page 4, lines 12-13:** The sum of the weights is 1.

**Page 7, lines 7-8:** Since Rikus' algorithm finds a subtropical jet for almost all time steps, we used at first every 14<sup>th</sup> of the found subtropical jet stream core for optimization.

**Page 8, line 20:** We agree with the referee: These differences are due to the undulations explained above.
